# Supplementary material for: CuFe2O4@PDA magnetic nanomaterials with a core–shell structure: synthesis and catalytic application in the degradation of methylene blue in water
Source: Royal Society of Chemistry journal article supplement (doi:10.1039/c5ra09114d), 2015-01-01
Supplement: c5ra09114d1.pdf [file c5ra09114d1.pdf]

**Supporting Information for**  
**CuFe<sub>2</sub>O<sub>4</sub>@PDA Magnetic Nanomaterials with Core-shell Structure: Synthesis and Catalytic Application in Degradation of Methylene Blue in Water Solution**

Su-dai Ma <sup>a,b</sup>, Jie Feng <sup>a,b</sup>, Wen-jie Qin <sup>a,b</sup>, Yu-yun Ju <sup>a,b</sup>,  
Xing-guo Chen <sup>a, b, c, \*</sup>

<sup>a</sup> *State Key Laboratory of Applied Organic Chemistry, Lanzhou University, Lanzhou, 730000, China*

<sup>b</sup> *Department of Chemistry, Lanzhou University, Lanzhou, 730000, China*

<sup>c</sup> *Key Laboratory of Nonferrous Metal Chemistry and Resources Utilization of Gansu Province, Lanzhou University, Lanzhou, 730000, China*

---

\* Corresponding author. Fax: +86-931-8912582 TEL: +86-931-8912763.

E-mail address: chenxg@lzu.edu.cn.

## Supplementary Figures

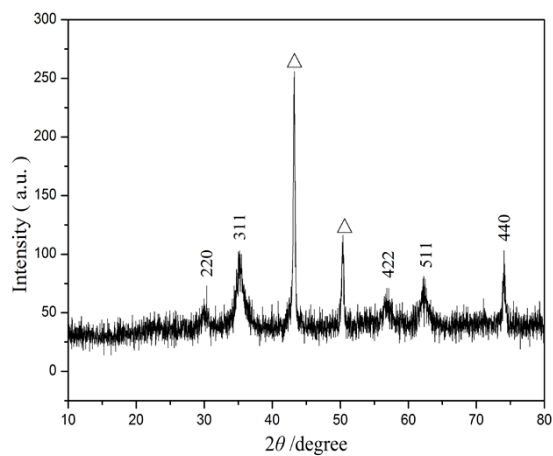

**Fig. S1.** XRD pattern of CuFe<sub>2</sub>O<sub>4</sub> MNPs. Symbols (Δ) represent peaks of Cu.

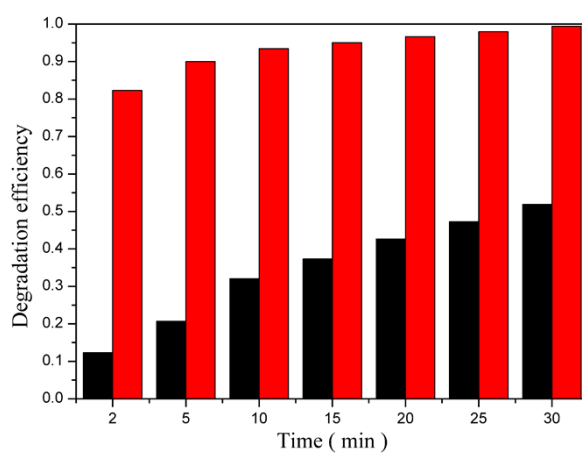

**Fig. S2.** The degradation efficiency of MB with CuFe<sub>2</sub>O<sub>4</sub>@PDA MNPs (red) and CuFe<sub>2</sub>O<sub>4</sub> MNPs (black).

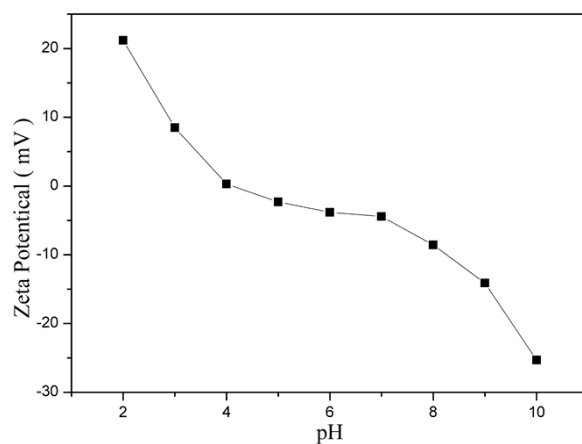

**Fig. S3.** Zeta potentials of CuFe<sub>2</sub>O<sub>4</sub>@PDA MNPs under different pH values.

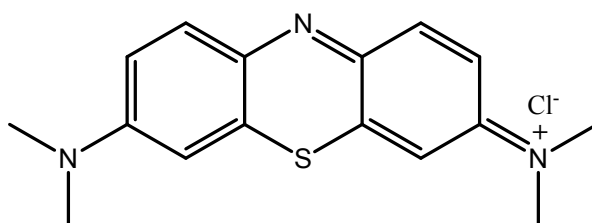

**Fig. S4.** The molecular structure of MB.

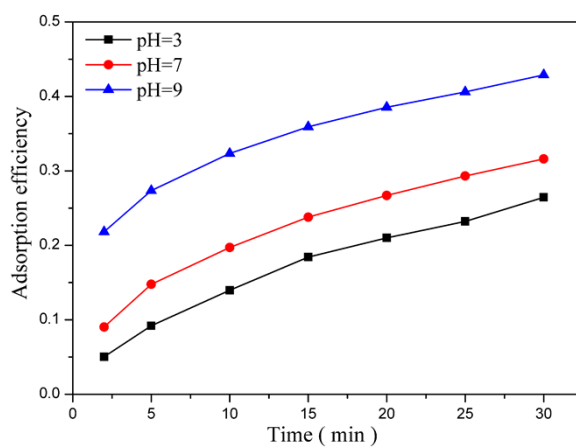

**Fig. S5.** The adsorption efficiency of MB solution by CuFe<sub>2</sub>O<sub>4</sub>@PDA MNPs at pH 3, pH 7, and pH 9.

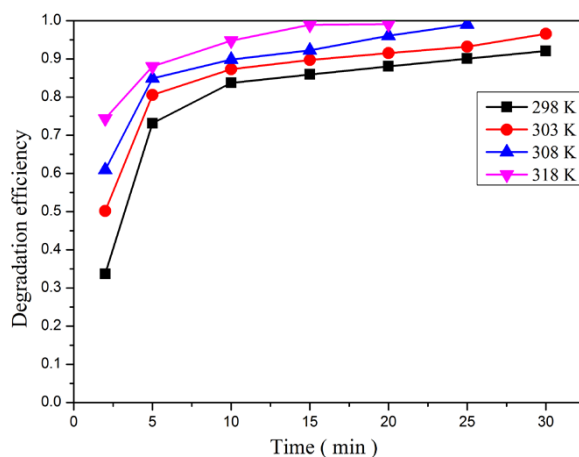

**Fig. S6.** Degradation of MB in systems of  $\text{H}_2\text{O}_2\text{-CuFe}_2\text{O}_4\text{@PDA}$  MNPs with increasing reaction time at different temperature: 298 K, 303 K, 308 K, 318 K.

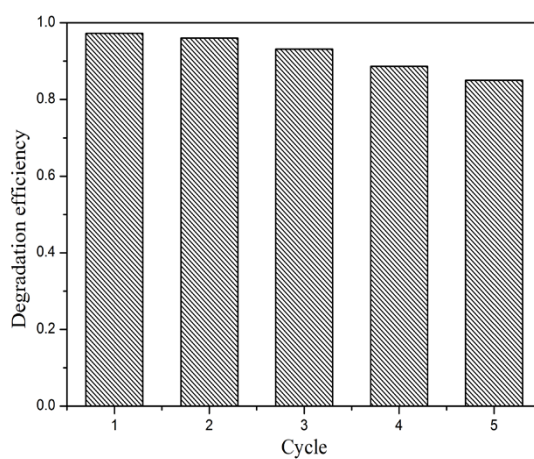

**Fig. S7.** Catalytic activity of  $\text{CuFe}_2\text{O}_4\text{@PDA}$  MNPs over various cycles of reutilization using identical reaction conditions.

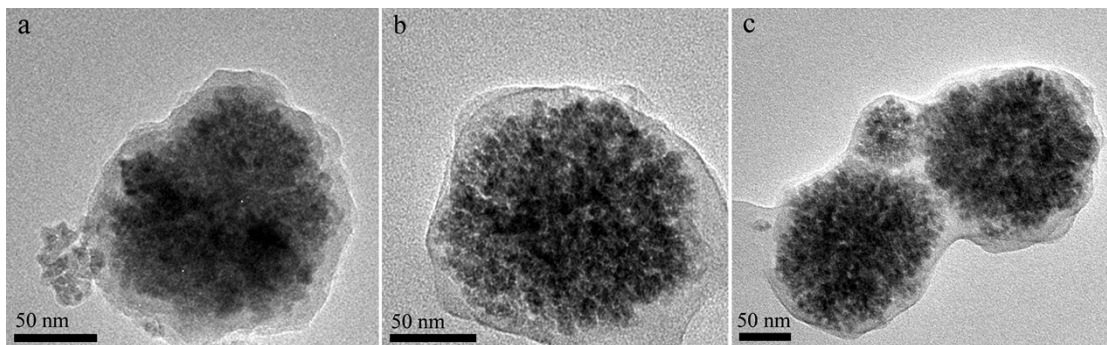

**Fig. S8.** TEM images of (a)  $\text{CuFe}_2\text{O}_4@\text{PDA}$  MNPs dispersed in aqueous solution for a month, (b)  $\text{CuFe}_2\text{O}_4@\text{PDA}$  MNPs dispersed in acid solution with pH 2 for 24 h, and (c)  $\text{CuFe}_2\text{O}_4@\text{PDA}$  MNPs dispersed in acid solution with pH 3 for 24 h.

## Generic Display Report

### Analysis Info

Analysis Name D:\Data\YANGY\new\MASUDA\150127\_1.d  
Method POS\_100-1000.m  
Sample Name  
Comment

Acquisition Date 1/27/2015 6:53:20 PM

Operator LZU  
Instrument micrOTOF

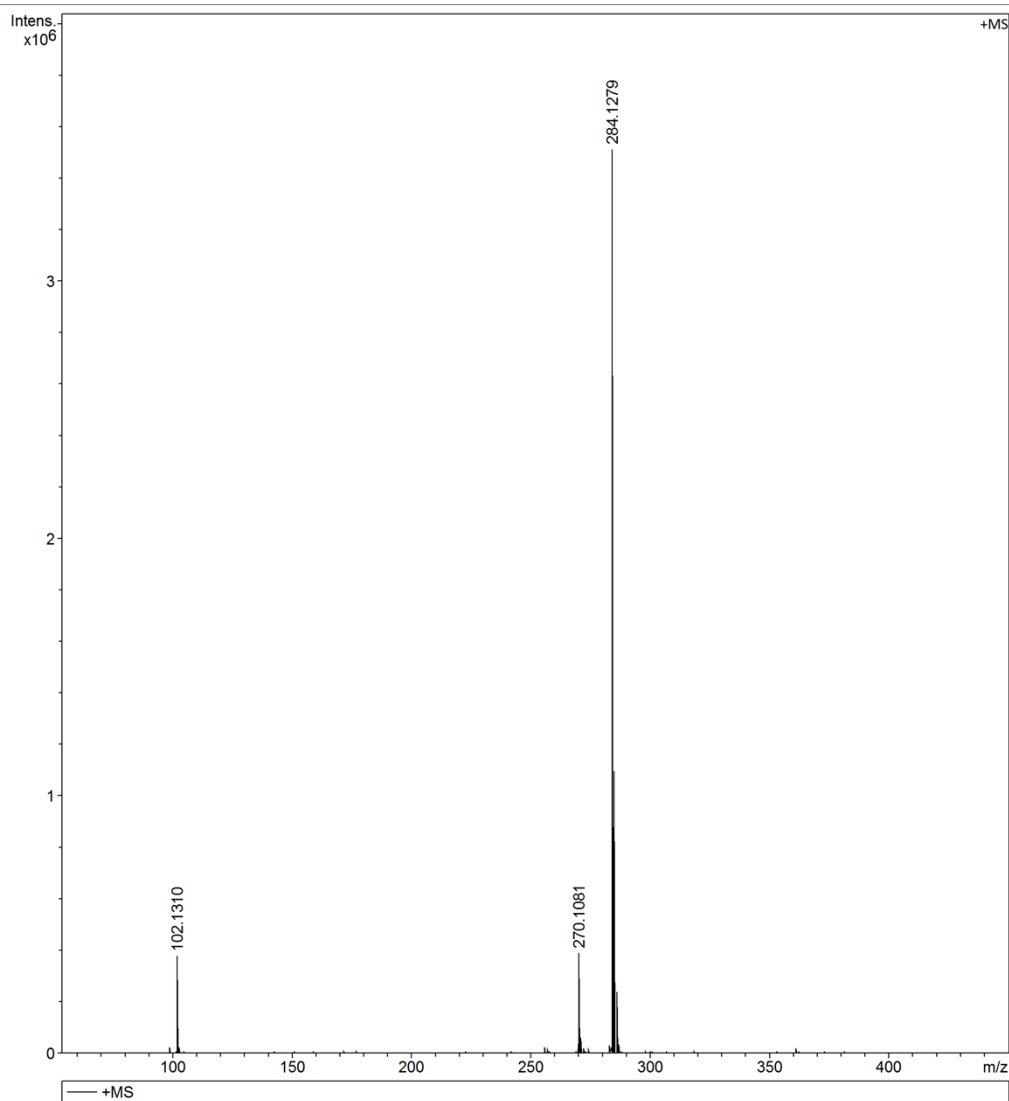

**Fig. S9.** Mass spectrum of the MB solution.

## Generic Display Report

### Analysis Info

Analysis Name D:\Data\YANGY\new\MASUDAI150127\_2.d  
Method POS\_100-1000.m  
Sample Name  
Comment

Acquisition Date 1/27/2015 6:57:54 PM

Operator LZU  
Instrument micrOTOF

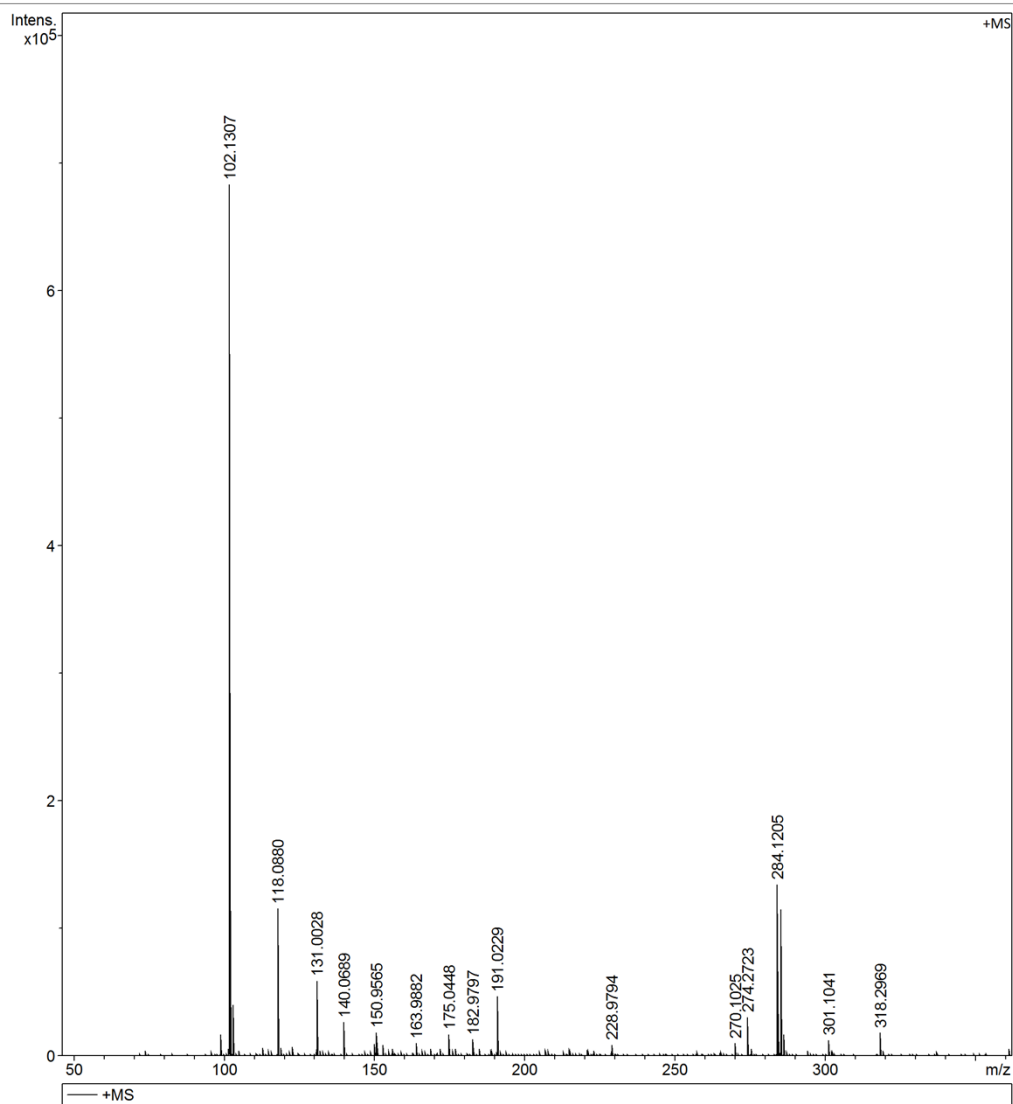

Bruker Compass DataAnalysis 4.1

printed: 1/29/2015 7:13:45 PM

by: LZU

Page 1 of 1

**Fig. S10.** Mass spectrum of resultant solution after degraded by  $\text{CuFe}_2\text{O}_4@PDA$  MNPs.

---

Intermediate

Molecular Weight

Molecular structure

---

|                                  |     |  |
|----------------------------------|-----|--|
| 3, 7-diamino-phenothiazine-5-ium | 228 |  |
| 2, 5-diaminobenzenesulfonic acid | 188 |  |
| DL-Norleucine                    | 131 |  |

Table S1. Data of mass spectral peaks for some fresh intermediates in degradation process.

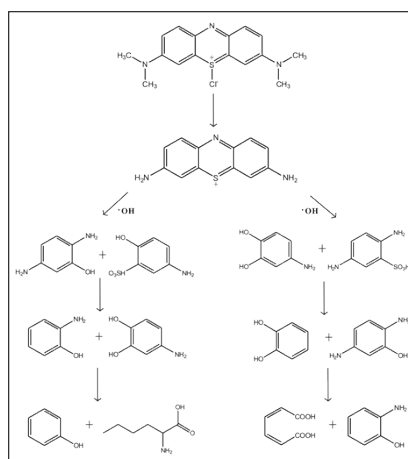

**Fig. S11.** Proposed generation pathway of some fresh intermediates were detected in mass spectrum.



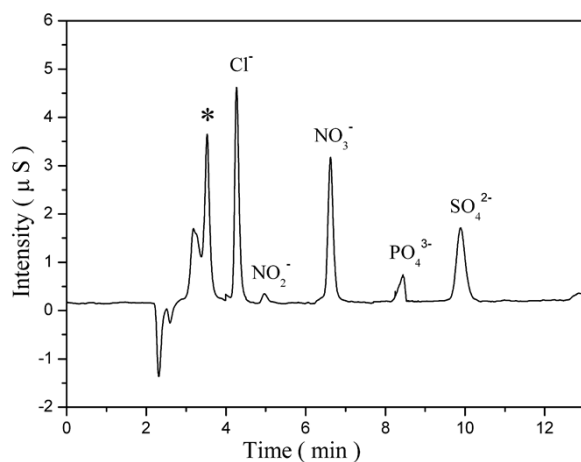

**Fig. S12.** Ion chromatography spectra of resultant solution after degraded by CuFe<sub>2</sub>O<sub>4</sub>@PDA MNPs. \*, is still not clear, may be organic acids. PO<sub>4</sub><sup>3-</sup> derives from the impurity of H<sub>2</sub>O<sub>2</sub> solution.

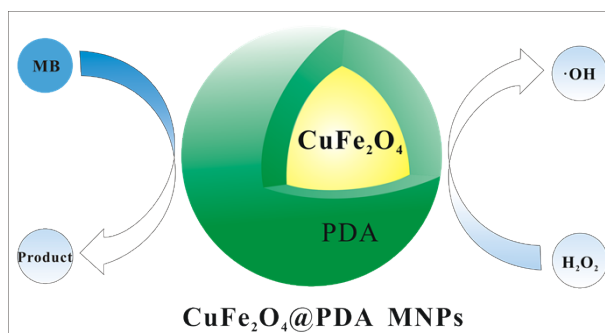

**Fig. S13.** Feasible mechanism of MB degradation on CuFe<sub>2</sub>O<sub>4</sub>@PDA MNPs at the existence of H<sub>2</sub>O<sub>2</sub>.

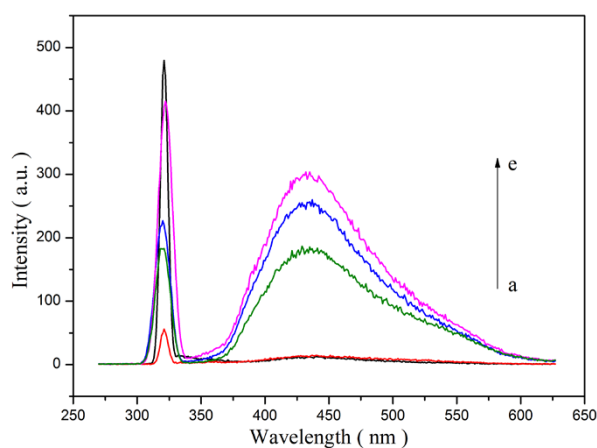

**Fig. S14.** The effect of  $\text{CuFe}_2\text{O}_4@\text{PDA}$  MNPs on the formation of hydroxyl radical with terephthalic acid as a fluorescence probe. (a)  $0.2 \text{ mg mL}^{-1}$   $\text{CuFe}_2\text{O}_4@\text{PDA}$  MNPs, without  $\text{H}_2\text{O}_2$ ; (b-e) 0, 0.2, 1, and  $2 \text{ mg mL}^{-1}$   $\text{CuFe}_2\text{O}_4@\text{PDA}$  MNPs,  $500 \text{ mM H}_2\text{O}_2$ . Reaction conditions:  $0.625 \text{ mM}$  terephthalic acid and different solutions were incubated in ultrapure water (pH 6.0) at  $30^\circ\text{C}$  for 1 h.
